# Supplementary material for: Chemosynthetic symbionts of marine invertebrate animals are capable of nitrogen fixation
Source: PubMed Central journal article supplement (PMC6872982; doi:10.1038/nmicrobiol.2016.195), 2016-10-24
Supplement: 41564_2017_BFnmicrobiol2016195_MOESM201_ESM.pdf [file 41564_2017_BFnmicrobiol2016195_MOESM201_ESM.pdf]

## **Chemosynthetic symbionts of marine invertebrate animals are capable of nitrogen fixation**

Jillian M Petersen, Anna Kemper, Harald Gruber-Vodicka, Ulisse Cardini, Matthijs van der Geest, Manuel Kleiner, Silvia Bulgheresi, Marc Mußmann, Craig Herbold, Brandon K. B. Seah, Chakkiath Paul Antony, Dan Liu, Alexandra Belitz, Miriam Weber

### **Supplementary Discussion**

#### **Confirming that the *nif* genes belong to the symbiont genomes**

In the lucinid symbiont genomes, the nitrogenase gene cluster was always found on a large contig of between 407 kb and 3.8 Mb in length. These contigs always contained many other genes identical to their homologs in the other symbiont draft genomes. The presence of *nif* gene clusters in the lucinid symbiont genomes is therefore unlikely to be due to random contamination in the lucinid symbionts.

Unlike the *Ca. Thiodiazotropha endoloripes* draft genomes, most of which assembled on fewer than 20 contigs, the draft genome of *Ca. Thiosymbion oneisti* was highly fragmented and could not be assembled on fewer than 2026 contigs. To confirm that the *nif* genes belong to the *Ca. Thiosymbion oneisti* genome, we did a connectivity analysis of the best assembly (*Ca. Thiosymbion oneisti* A) using the software Bandage<sup>1</sup>. This analysis showed clear connections between the ribosomal RNA operon of *Ca. Thiosymbion oneisti* and the core *nif* genes

within eight graph nodes, confirming the physical linkage between these gene clusters (Supplementary Figure 1).

### **Nitrogenase regulation in the *Loripes lucinalis* symbiosis**

Nitrogenase transcripts or proteins could not be detected in all lucinid individuals analysed (Datasets 1 and 2). This could be due to 1) the absence of these genes in the symbiont populations in some host individuals, or 2) down-regulation of the nitrogenase by the populations of symbionts in some individuals. A recent study of the sulphur-oxidizing symbionts of deep-sea mussels showed that different strains of bacteria colonize these mussels, and that some metabolic capabilities such as hydrogen oxidation are only encoded by some symbiont strains<sup>2</sup>. In the lucinid symbionts, a number of observations indicate that our results reflect regulation of gene expression and not strain-level differences in nitrogen-fixing ability. Firstly, in all draft genomes, the nitrogenase gene cluster was found on a large contig (between 407 kb and 3.8 Mb in length), and the metagenome coverage of the *nif* gene cluster was similar to the rest of the genome, indicating that it is likely present in all symbionts in a particular host individual (for an example see Supplementary Figure 6). Secondly, although the nitrogenase genes were not among the 30 most abundantly expressed in three of the five individuals sequenced for transcriptomics, a few transcripts did map to these genes (Supplementary Dataset 1). Finally, using specific primers, we were able to amplify and sequence a  $\approx 290$  bp fragment of the *nifH* gene from DNA extracted from the same samples used for the transcriptome analysis. These sequences were 99%-100% identical to the *nifH* gene from *Loripes lucinalis* symbiont A, which we used as a reference for transcriptome mapping. This

indicates that at least the *nifH* gene is present in the symbionts of the clam individuals where few or no transcripts could be detected. Nitrogen fixation therefore seems to be tightly regulated by the *Ca. Thiodiazotropha endoloripes*, similar to other known nitrogen fixers (reviewed by<sup>3</sup>).

Our expression studies are consistent with the hypothesis that nitrogen fixation genes are upregulated when the symbionts experience nitrogen limitation.

Expression of genes encoding transporters for ammonium and urea could only be detected in those individuals where nitrogenases could also be detected, both in our transcriptomics and proteomics studies (Figure 4, Supplementary Figure 4, Supplementary Datasets 1 and 2). In *Corynebacterium glutamicum*, a model organism for studies of the regulation of nitrogen metabolism, ammonium and urea transporters are strongly upregulated under ammonium-limiting nitrogen-fixing conditions<sup>4</sup>.

### **Carbon and nitrogen fixation at the single-cell level**

Nitrogen fixation is metabolically costly, requiring eight electrons and up to 16 molecules of ATP per molecule of  $N_2$  reduced to  $NH_3$  and  $H_2$ <sup>5</sup>. Most nitrogen-fixing bacteria rely on phototrophic or heterotrophic metabolism to power nitrogen fixation. However, exceptions are known, such as acidophilic iron oxidizers of the *Leptospirillum* group III from acid mine drainage biofilms, which can fix nitrogen and inorganic carbon using reduced iron as the sole energy source, without the addition of organic carbon<sup>6</sup>. Metabolic reconstruction from our draft genomes showed that the bivalve and nematode symbionts encode complete TCA cycles and genes for importing organic compounds (Figure 2).

Moreover, based on our transcriptomes, the complete TCA cycle was expressed in all five individuals of *Loripes lucinalis* sequenced (Supplementary Dataset 1). It is currently unclear whether single symbiont cells are capable of fixing nitrogen and carbon simultaneously, using the energy gained from sulfide oxidation. Nitrogen-fixing symbiont cells may supplement their energy needs by taking up organic carbon. Possibly, the symbiont population may be partitioned into two sub-populations: one fixing carbon, and the other fixing nitrogen, as has been shown for the phototrophic cyanobacterium *Crocospaera watsonii*<sup>7</sup>. This could also explain our transcriptome results, which indicated that aerobic and anaerobic metabolisms function concurrently in the gills. A sub-population experiencing aerobic conditions might preferentially fix carbon, and a sub-population experiencing micro-aerobic or anaerobic conditions might preferentially fix nitrogen. Future experiments tracking the incorporation of N<sub>2</sub>, CO<sub>2</sub> and organic compounds at the single-cell level, for example with nanoSIMS, would help to answer these questions.

## References

1. Wick, R. R., Schultz, M. B., Zobel, J. & Holt, K. E. Bandage: interactive visualization of *de novo* genome assemblies: Fig. 1. *Bioinformatics* **31**, 3350–3352 (2015).
2. Ikuta, T. *et al.* Heterogeneous composition of key metabolic gene clusters in a vent mussel symbiont population. *ISME J.* (2015).
3. Dixon, R. & Kahn, D. Genetic regulation of biological nitrogen fixation. *Nat. Rev. Microbiol.* **2**, 621–631 (2004).

4. Silberbach, M. *et al.* Adaptation of *Corynebacterium glutamicum* to ammonium limitation: a global analysis using transcriptome and proteome techniques. *Appl. Environ. Microbiol.* **71**, 2391–2402 (2005).
5. Karl, D. *et al.* *Dinitrogen fixation in the world's oceans*. (Springer Business and Science Media, 2002).
6. Tyson, G. W. *et al.* Genome-directed isolation of the key nitrogen fixer *Leptospirillum ferrodiazotrophum* sp. nov. from an acidophilic microbial community. *Appl. Environ. Microbiol.* **71**, 6319–6324 (2005).
7. Mohr, W., Vagner, T., Kuypers, M. M. M., Ackermann, M. & LaRoche, J. Resolution of conflicting signals at the single-cell level in the regulation of cyanobacterial photosynthesis and nitrogen fixation. *PLoS ONE* **8**, e66060 (2013).
8. Taylor, J. D. & Glover, E. A. Lucinidae (Bivalvia) - the most diverse group of chemosymbiotic molluscs. *Zool. J. Linn. Soc.* **148**, 421–438 (2006).

## Supplementary Tables

### Supplementary Table 1. Samples used in this study

| Species                      | Location                                             | Coordinates                      | Depth      | Habitat                                               | Sampling method                              | Purpose* | Date                                               | Fixation            |
|------------------------------|------------------------------------------------------|----------------------------------|------------|-------------------------------------------------------|----------------------------------------------|----------|----------------------------------------------------|---------------------|
| <i>Laxus oneistus</i>        | Carrie Bow Cay, Belize                               | 16°48'11" N,<br>88°04'55" W      | 1 m        | Back-reef sand bar                                    | Sieved from sediment                         | G        | March 2014                                         | RNAlater            |
| <i>Loripes lucinalis</i>     | Bay of Fetovaia, Elba,<br>Italy                      | 42°43'49.0" N,<br>10°09'20.5" E  | 7 m        | Next to <i>Posidonia oceanica</i><br>seagrass bed     | SCUBA diving, digging<br>clams from sediment | G        | 20 <sup>th</sup> Oct, 2010                         | RNAlater            |
|                              |                                                      |                                  |            |                                                       |                                              | T        | 2 <sup>nd</sup> Jun, 2015                          | RNAlater            |
|                              |                                                      |                                  |            |                                                       |                                              | Pr       | 24 <sup>th</sup> Oct, 2015                         | Frozen              |
|                              |                                                      |                                  |            |                                                       |                                              | SI       | 21 <sup>st</sup> and 24 <sup>th</sup> Oct,<br>2015 | Frozen              |
| <i>Loripes lucinalis</i>     | Thau Lagoon, France                                  | 43°26'53.95" N,<br>3°39'6.54" E  | 0.5 m      | <i>Zostera noltii</i> seagrass beds                   | Sieved from sediment cores                   | P        | 12 <sup>th</sup> Dec, 2015                         | 96% Ethanol         |
| <i>Loripes lucinalis</i>     | Banc d'Arguin,<br>Mauritania                         | 19°53'0" N,<br>16°18'0" W        | Intertidal | <i>Zostera noltii</i> seagrass beds                   | Sieved from sediment cores                   | SI       | 7 <sup>th</sup> to 21 <sup>st</sup> May,<br>2008   | Frozen              |
|                              |                                                      | 19°53'0" N,<br>16°18'0" W        | Intertidal | <i>Zostera noltii</i> seagrass beds                   | Sieved from sediment                         | P        | 9 <sup>th</sup> Dec, 2015                          | RNAlater            |
| <i>Codakia orbicularis</i>   | St George's Cay, Bahamas                             | 25°33'7.04" N,<br>76°45'56.85" W | Intertidal | <i>Thalassia testudinum</i> seagrass<br>bed           | Haphazard digging in<br>seagrass sediment    | P        | 24 <sup>th</sup> Dec, 2015                         | RNAlater            |
| <i>Euanodontia ovum</i>      | Near boat jetty for Isle<br>aux Aigrettes, Mauritius | 20°25'26" S,<br>57°45'23" E      | Intertidal | <i>Halodule</i> and <i>Halophila</i><br>seagrass beds | Sieved from sediment                         | P        | 2 <sup>nd</sup> May, 2015                          | Absolute<br>ethanol |
| <i>Clathrolucina costada</i> | Opposite Hyatt resort,<br>SW Curaçao                 | 12°03'57" N,<br>68°51'13" W      | 0.5 to 1 m | <i>Thalassia</i> and <i>Halodule</i> seagrass<br>beds | Sieved from sediment                         | P        | 22 <sup>nd</sup> May, 2015                         | Absolute<br>ethanol |

\*Purpose: G = genomics, T = transcriptomics, Pr = proteomics, SI = stable isotopes, P = PCR amplification

**Supplementary Table 2. Results of PCR screening in diverse lucinid species**

| Host subfamily§ | Species                        | Sampling location | # of individuals | Sequences obtained*                          |                        |
|-----------------|--------------------------------|-------------------|------------------|----------------------------------------------|------------------------|
|                 |                                |                   |                  | 16S                                          | nifH                   |
| Lucininae       | <i>Loripes lucinalis</i>       | Mauritania        | 3                | LT548935 -<br>LT548936                       | LT548952 -<br>LT548954 |
| Lucininae       | <i>Loripes lucinalis</i>       | France            | 2                | LT548933 -<br>LT548934                       | LT548950 -<br>LT548951 |
| Lucininae       | <i>Clathrolucina costata</i>   | Curacao           | 1                | LT548918                                     | LT548937               |
| Codakiinae      | <i>Codakia orbicularis</i>     | Bahamas           | 3                | LT548919 -<br>LT548921                       | LT548938 -<br>LT548940 |
| Pegophyseminae  | <i>Euanodontia ovum</i>        | Mauritius         | 1                | LT548923                                     | LT548941               |
| Leucosphaerinae | <i>Epidulcina cf delphinae</i> | Madagascar        | 1                | Only 16S rRNA could be amplified<br>LT548922 |                        |
| Codakiinae      | <i>Lucinoma borealis</i>       | Tjärnö, Sweden    | 1                | Only 16S rRNA could be amplified<br>LT548924 |                        |

§Subfamilies as defined by Taylor and Glover<sup>8</sup>

\*Accession numbers

**Supplementary Table 3. Stable isotope data used in this study**

| Location                  | Site | Latitude      | Longitude     | Date sampled | Species                      | ID    | Shell length (mm) | Dry mass (mg) | $\delta^{13}\text{C}$ (‰) | $\delta^{15}\text{N}$ (‰) |
|---------------------------|------|---------------|---------------|--------------|------------------------------|-------|-------------------|---------------|---------------------------|---------------------------|
| Banc d'Arguin, Mauritania | 1    | 19°53'54.4" N | 16°19'49.4" W | 18-May-08    | <i>Pelecypora isocardia</i>  | 16950 | 6.5               | 0.216         | -17.70                    | 5.93                      |
| Banc d'Arguin, Mauritania | 1    | 19°53'54.4" N | 16°19'49.4" W | 18-May-08    | <i>Loripes lucinalis</i>     | 16951 | 7                 | 0.224         | -23.62                    | -1.07                     |
| Banc d'Arguin, Mauritania | 2    | 19°53'57.7" N | 16°18'36.6" W | 10-May-08    | <i>Pelecypora isocardia</i>  | 16411 | 14.8              | 0.277         | -17.70                    | 6.92                      |
| Banc d'Arguin, Mauritania | 2    | 19°53'57.7" N | 16°18'36.6" W | 10-May-08    | <i>Senilia senilis</i>       | 16414 | 57.8              | 0.239         | -17.51                    | 8.47                      |
| Banc d'Arguin, Mauritania | 3    | 19°52'36.7" N | 16°15'55.2" W | 08-May-08    | <i>Loripes lucinalis</i>     | 16226 | 10.9              | 0.230         | -20.31                    | 0.22                      |
| Banc d'Arguin, Mauritania | 4    | 19°53'33.2" N | 16°18'44.1" W | 15-May-08    | <i>Diplodonta circularis</i> | 16688 | 14.2              | 0.216         | -16.20                    | 5.57                      |
| Banc d'Arguin, Mauritania | 5    | 19°53'26.3" N | 16°19'41.6" W | 15-May-08    | <i>Pelecypora isocardia</i>  | 16785 | 13.5              | 0.230         | -17.80                    | 6.36                      |
| Banc d'Arguin, Mauritania | 5    | 19°53'26.3" N | 16°19'41.6" W | 15-May-08    | <i>Senilia senilis</i>       | 16783 | 59.3              | 0.252         | -19.58                    | 7.84                      |
| Banc d'Arguin, Mauritania | 6    | 19°53'23.5" N | 16°16'46.3" W | 08-May-08    | <i>Pelecypora isocardia</i>  | 16258 | 19.3              | 0.246         | -17.91                    | 6.20                      |
| Banc d'Arguin, Mauritania | 7    | 19°53'38.9" N | 16°16'48.1" W | 08-May-08    | <i>Senilia senilis</i>       | 16251 | 40.6              | 0.251         | -19.16                    | 7.40                      |
| Banc d'Arguin, Mauritania | 8    | 19°52'47.8" N | 16°16'27.1" W | 11-May-08    | <i>Diplodonta circularis</i> | 16448 | 9.6               | 0.192         | -15.71                    | 4.08                      |
| Banc d'Arguin, Mauritania | 9    | 19°54'32.9" N | 16°19'50" W   | 12-May-08    | <i>Loripes lucinalis</i>     | 16496 | 6.7               | 0.322         | -24.30                    | 2.66                      |
| Banc d'Arguin, Mauritania | 9    | 19°54'32.9" N | 16°19'50" W   | 12-May-08    | <i>Diplodonta circularis</i> | 16498 | 12.2              | 0.297         | -18.14                    | 5.30                      |
| Banc d'Arguin, Mauritania | 10   | 19°54'52" N   | 16°18'56" W   | 12-May-08    | <i>Senilia senilis</i>       | 16480 | 16.1              | 0.251         | -18.47                    | 6.11                      |
| Banc d'Arguin, Mauritania | 11   | 19°53'36.5" N | 16°16'36.1" W | 07-May-08    | <i>Loripes lucinalis</i>     | 16221 | 9.9               | 0.213         | -24.48                    | -3.67                     |
| Banc d'Arguin, Mauritania | 12   | 19°52'56.4" N | 16°15'26.1" W | 08-May-08    | <i>Pelecypora isocardia</i>  | 16262 | 10.6              | 0.226         | -15.63                    | 3.86                      |
| Banc d'Arguin, Mauritania | 13   | 19°53'54.4" N | 16°18'33.1" W | 10-May-08    | <i>Pelecypora isocardia</i>  | 16354 | 5.9               | 0.195         | -15.14                    | 6.90                      |



|                           |    |               |               |           |                              |       |      |       |        |       |
|---------------------------|----|---------------|---------------|-----------|------------------------------|-------|------|-------|--------|-------|
| Banc d'Arguin, Mauritania | 13 | 19°53'54.4" N | 16°18'33.1" W | 10-May-08 | <i>Senilia senilis</i>       | 16352 | 17.5 | 0.235 | -16.01 | 7.93  |
| Banc d'Arguin, Mauritania | 14 | 19°53'51.8" N | 16°18'52.9" W | 10-May-08 | <i>Loripes lucinalis</i>     | 16409 | 8.1  | 0.310 | -25.43 | -2.79 |
| Banc d'Arguin, Mauritania | 15 | 19°52'52" N   | 16°16'6.5" W  | 08-May-08 | <i>Loripes lucinalis</i>     | 16233 | 6.5  | 0.262 | -19.07 | 0.05  |
| Banc d'Arguin, Mauritania | 16 | 19°53'23.8" N | 16°19'41.6" W | 15-May-08 | <i>Senilia senilis</i>       | 16778 | 56.1 | 0.208 | -19.84 | 7.55  |
| Banc d'Arguin, Mauritania | 17 | 19°53'12.7" N | 16°15'28" W   | 16-May-08 | <i>Senilia senilis</i>       | 16881 | 16.3 | 0.247 | -12.54 | 5.34  |
| Banc d'Arguin, Mauritania | 18 | 19°53'23.9" N | 16°15'45.2" W | 07-May-08 | <i>Pelecypora isocardia</i>  | 16209 | 8.3  | 0.187 | -15.17 | 5.27  |
| Banc d'Arguin, Mauritania | 18 | 19°53'23.9" N | 16°15'45.2" W | 07-May-08 | <i>Senilia senilis</i>       | 16210 | 54.1 | 0.323 | -15.21 | 7.83  |
| Banc d'Arguin, Mauritania | 19 | 19°52'27.1" N | 16°17'25.4" W | 15-May-08 | <i>Loripes lucinalis</i>     | 16751 | 8.6  | 0.216 | -24.42 | -4.36 |
| Banc d'Arguin, Mauritania | 20 | 19°53'44.9" N | 16°19'43.6" W | 15-May-08 | <i>Pelecypora isocardia</i>  | 16801 | 8    | 0.268 | -15.62 | 5.50  |
| Banc d'Arguin, Mauritania | 21 | 19°54'26.8" N | 16°18'58.3" W | 14-May-08 | <i>Pelecypora isocardia</i>  | 16621 | 6.3  | 0.282 | -18.76 | 6.57  |
| Banc d'Arguin, Mauritania | 22 | 19°53'40.7" N | 16°16'26.6" W | 07-May-08 | <i>Senilia senilis</i>       | 16214 | 54.4 | 0.221 | -14.03 | 7.19  |
| Banc d'Arguin, Mauritania | 23 | 19°52'52.9" N | 16°15'58.7" W | 08-May-08 | <i>Loripes lucinalis</i>     | 16259 | 10.4 | 0.205 | -22.77 | -1.23 |
| Banc d'Arguin, Mauritania | 24 | 19°50'54.1" N | 16°16'10.7" W | 21-May-08 | <i>Diplodonta circularis</i> | 18275 | 19.4 | 0.260 | -13.61 | 4.82  |
| Banc d'Arguin, Mauritania | 25 | 19°52'54.9" N | 16°16'58.9" W | 11-May-08 | <i>Senilia senilis</i>       | 16437 | 40.4 | 0.290 | -18.30 | 7.34  |
| Banc d'Arguin, Mauritania | 26 | 19°53'20.1" N | 16°18'53.5" W | 13-May-08 | <i>Loripes lucinalis</i>     | 16594 | 7.3  | 0.213 | -24.42 | 3.34  |
| Banc d'Arguin, Mauritania | 27 | 19°53'55.5" N | 16°19'41.9" W | 18-May-08 | <i>Pelecypora isocardia</i>  | 16966 | 17   | 0.189 | -17.10 | 5.88  |
| Banc d'Arguin, Mauritania | 28 | 19°54'36.1" N | 16°19'47.4" W | 18-May-08 | <i>Senilia senilis</i>       | 16945 | 30.8 | 0.332 | -19.82 | 7.27  |
| Banc d'Arguin, Mauritania | 29 | 19°52'48.5" N | 16°16'50.3" W | 11-May-08 | <i>Loripes lucinalis</i>     | 16424 | 6.9  | 0.303 | -24.28 | -3.64 |
| Banc d'Arguin, Mauritania | 30 | 19°53'25.9" N | 16°18'44.9" W | 15-May-08 | <i>Senilia senilis</i>       | 16744 | 19.3 | 0.233 | -17.39 | 7.35  |
| Banc d'Arguin, Mauritania | 31 | 19°53'56.1" N | 16°20'11.2" W | 13-May-08 | <i>Diplodonta circularis</i> | 16610 | 4.8  | 0.127 | -18.55 | 5.72  |
| Banc d'Arguin, Mauritania | 32 | 19°52'53.3" N | 16°17'2.3" W  | 21-May-08 | <i>Senilia senilis</i>       | 18307 | 22.3 | 0.333 | -18.66 | 7.10  |

|                           |    |               |               |           |                          |           |      |       |        |       |
|---------------------------|----|---------------|---------------|-----------|--------------------------|-----------|------|-------|--------|-------|
| Banc d'Arguin, Mauritania | 33 | 19°53'32.8" N | 16°15'50.5" W | 07-May-08 | <i>Loripes lucinalis</i> | 16204     | 9.8  | 0.293 | -23.75 | -0.34 |
| Banc d'Arguin, Mauritania | 34 | 19°52'31.9" N | 16°17'28" W   | 20-May-08 | <i>Loripes lucinalis</i> | 18266     | 5.6  | 0.248 | -22.73 | 1.66  |
| Banc d'Arguin, Mauritania | 35 | 19°54'56.9" N | 16°18'41.4" W | 12-May-08 | <i>Senilia senilis</i>   | 16526     | 55.7 | 0.244 | -19.64 | 7.72  |
| Banc d'Arguin, Mauritania | 36 | 19°53'19.4" N | 16°16'47.1" W | 22-May-08 | <i>Senilia senilis</i>   | 18321     | 60.9 | 0.335 | -16.45 | 8.58  |
| Banc d'Arguin, Mauritania | 37 | 19°53'29.8" N | 16°18'56.2" W | 19-May-08 | <i>Senilia senilis</i>   | 16988     | 36.1 | 0.250 | -19.77 | 7.73  |
| Banc d'Arguin, Mauritania | 38 | 19°54'28" N   | 16°19'56.8" W | 18-May-08 | <i>Loripes lucinalis</i> | 16956     | 9.3  | 0.286 | -24.38 | 3.23  |
| Banc d'Arguin, Mauritania | 39 | 19°52'43.6" N | 16°16'51.1" W | 11-May-08 | <i>Senilia senilis</i>   | 16429     | 48   | 0.249 | -18.60 | 7.34  |
| Elba, Italy               | 1  | 42°43'49.0" N | 10°09'20.5" E | 21-Oct-15 | <i>Loripes lucinalis</i> | 2015D1-1  | 14   | 0.624 | -26.40 | 2.52  |
| Elba, Italy               | 1  | 42°43'49.0" N | 10°09'20.5" E | 21-Oct-15 | <i>Loripes lucinalis</i> | 2015D1-2  | 16.5 | 0.617 | -27.44 | -4.76 |
| Elba, Italy               | 1  | 42°43'49.0" N | 10°09'20.5" E | 21-Oct-15 | <i>Loripes lucinalis</i> | 2015D1-3  | 14   | 0.305 | -26.05 | 1.90  |
| Elba, Italy               | 1  | 42°43'49.0" N | 10°09'20.5" E | 21-Oct-15 | <i>Loripes lucinalis</i> | 2015D1-4  | 11.2 | 0.306 | -26.62 | -2.90 |
| Elba, Italy               | 1  | 42°43'49.0" N | 10°09'20.5" E | 21-Oct-15 | <i>Loripes lucinalis</i> | 2015D1-5  | 10.8 | 0.608 | -25.80 | 1.27  |
| Elba, Italy               | 1  | 42°43'49.0" N | 10°09'20.5" E | 21-Oct-15 | <i>Loripes lucinalis</i> | 2015D1-6  | 11.8 | 0.664 | -27.44 | -4.11 |
| Elba, Italy               | 1  | 42°43'49.0" N | 10°09'20.5" E | 21-Oct-15 | <i>Loripes lucinalis</i> | 2015D1-7  | 9.3  | 0.412 | -25.75 | 1.69  |
| Elba, Italy               | 1  | 42°43'49.0" N | 10°09'20.5" E | 21-Oct-15 | <i>Loripes lucinalis</i> | 2015D1-8  | 11   | 0.405 | -19.79 | 2.24  |
| Elba, Italy               | 1  | 42°43'49.0" N | 10°09'20.5" E | 21-Oct-15 | <i>Loripes lucinalis</i> | 2015D1-9  | 10   | 0.637 | -27.13 | -5.04 |
| Elba, Italy               | 1  | 42°43'49.0" N | 10°09'20.5" E | 21-Oct-15 | <i>Loripes lucinalis</i> | 2015D1-10 | 8.1  | 0.631 | -26.38 | -0.53 |
| Elba, Italy               | 3  | 42°43'49.0" N | 10°09'20.5" E | 24-Oct-15 | <i>Loripes lucinalis</i> | 2015D3-22 | 6    | 0.587 | -25.93 | -1.81 |
| Elba, Italy               | 3  | 42°43'49.0" N | 10°09'20.5" E | 24-Oct-15 | <i>Loripes lucinalis</i> | 2015D3-23 | 5.5  | 0.883 | -25.36 | -1.22 |
| Elba, Italy               | 3  | 42°43'49.0" N | 10°09'20.5" E | 24-Oct-15 | <i>Loripes lucinalis</i> | 2015D3-24 | 5.5  | 0.800 | -26.01 | -1.06 |
| Elba, Italy               | 3  | 42°43'49.0" N | 10°09'20.5" E | 24-Oct-15 | <i>Loripes lucinalis</i> | 2015D3-25 | 5.6  | 0.805 | -25.60 | 0.10  |
| Elba, Italy               | 3  | 42°43'49.0" N | 10°09'20.5" E | 24-Oct-15 | <i>Loripes lucinalis</i> | 2015D3-26 | 9    | 0.819 | -27.26 | -4.07 |
| Elba, Italy               | 3  | 42°43'49.0" N | 10°09'20.5" E | 24-Oct-15 | <i>Loripes lucinalis</i> | 2015D3-27 | 5.7  | 0.679 | -24.91 | -2.25 |
| Elba, Italy               | 3  | 42°43'49.0" N | 10°09'20.5" E | 24-Oct-15 | <i>Loripes lucinalis</i> | 2015D3-28 | 6.5  | 0.815 | -25.28 | -1.66 |
| Elba, Italy               | 3  | 42°43'49.0" N | 10°09'20.5" E | 24-Oct-15 | <i>Loripes lucinalis</i> | 2015D3-29 | 6.2  | 0.746 | -25.97 | -0.87 |

|             |   |               |               |           |                          |           |     |       |        |       |
|-------------|---|---------------|---------------|-----------|--------------------------|-----------|-----|-------|--------|-------|
| Elba, Italy | 3 | 42°43'49.0" N | 10°09'20.5" E | 24-Oct-15 | <i>Loripes lucinalis</i> | 2015D3-30 | 7   | 0.838 | -26.85 | -1.00 |
| Elba, Italy | 3 | 42°43'49.0" N | 10°09'20.5" E | 24-Oct-15 | <i>Loripes lucinalis</i> | 2015D3-31 | 6.2 | 0.885 | -26.71 | -0.08 |

**Supplementary Table 4.** Parameter estimates of the linear mixed-effect model with either nitrogen **(A)** or carbon **(B)** stable isotope ratios (‰) as the dependent variable.

|                                                                | Estimate | SE   | P      |
|----------------------------------------------------------------|----------|------|--------|
| <b>(A) Nitrogen stable isotope (<math>\delta^{15}N</math>)</b> |          |      |        |
| Intercept                                                      | -0.47    | 0.73 | 0.53   |
| Species <sup>1</sup>                                           |          |      |        |
| <i>L. lucinalis</i> (Italy)                                    | -0.61    | 1.03 | 0.56   |
| <i>S. senilis</i>                                              | 7.87     | 0.75 | <0.001 |
| <i>P. isocardia</i>                                            | 6.21     | 0.77 | <0.001 |
| <i>D. circularis</i>                                           | 5.52     | 0.79 | <0.001 |
| Random effects                                                 |          |      |        |
| $\sigma_{\text{sampling site}}$                                | 0.72     |      |        |
| $\sigma_{\text{residual}}$                                     | 0.20     |      |        |
| Variance function                                              |          |      |        |
| $\sigma_{L.lucinalis}$                                         | 12.72    |      |        |
| $\sigma_{L.lucinalis (italy)}$                                 | 11.58    |      |        |
| $\sigma_{S.senilis}$                                           | 1.00     |      |        |
| $\sigma_{P.isocardia}$                                         | 2.88     |      |        |
| $\sigma_{D.Circularis}$                                        | 0.00     |      |        |
| <b>(B) Carbon stable isotope (<math>\delta^{13}C</math>)</b>   |          |      |        |
| Intercept                                                      | -23.32   | 0.52 | <0.001 |
| Species <sup>1</sup>                                           |          |      |        |
| <i>L. lucinalis</i> (Italy)                                    | -2.61    | 1.00 | 0.01   |
| <i>S. senilis</i>                                              | 5.59     | 0.69 | <0.001 |
| <i>P. isocardia</i>                                            | 6.39     | 0.77 | <0.001 |
| <i>D. circularis</i>                                           | 6.91     | 0.97 | <0.001 |
| Random effects                                                 |          |      |        |
| $\sigma_{\text{sampling site}}$                                | 1.11     |      |        |
| $\sigma_{\text{residual}}$                                     | 1.55     |      |        |

<sup>1</sup>Reference category: *L. lucinalis* (Mauritania)

## Supplementary Figures

### Supplementary Figure 1. Connectivity analysis of the *Laxus oneistus* A metagenome

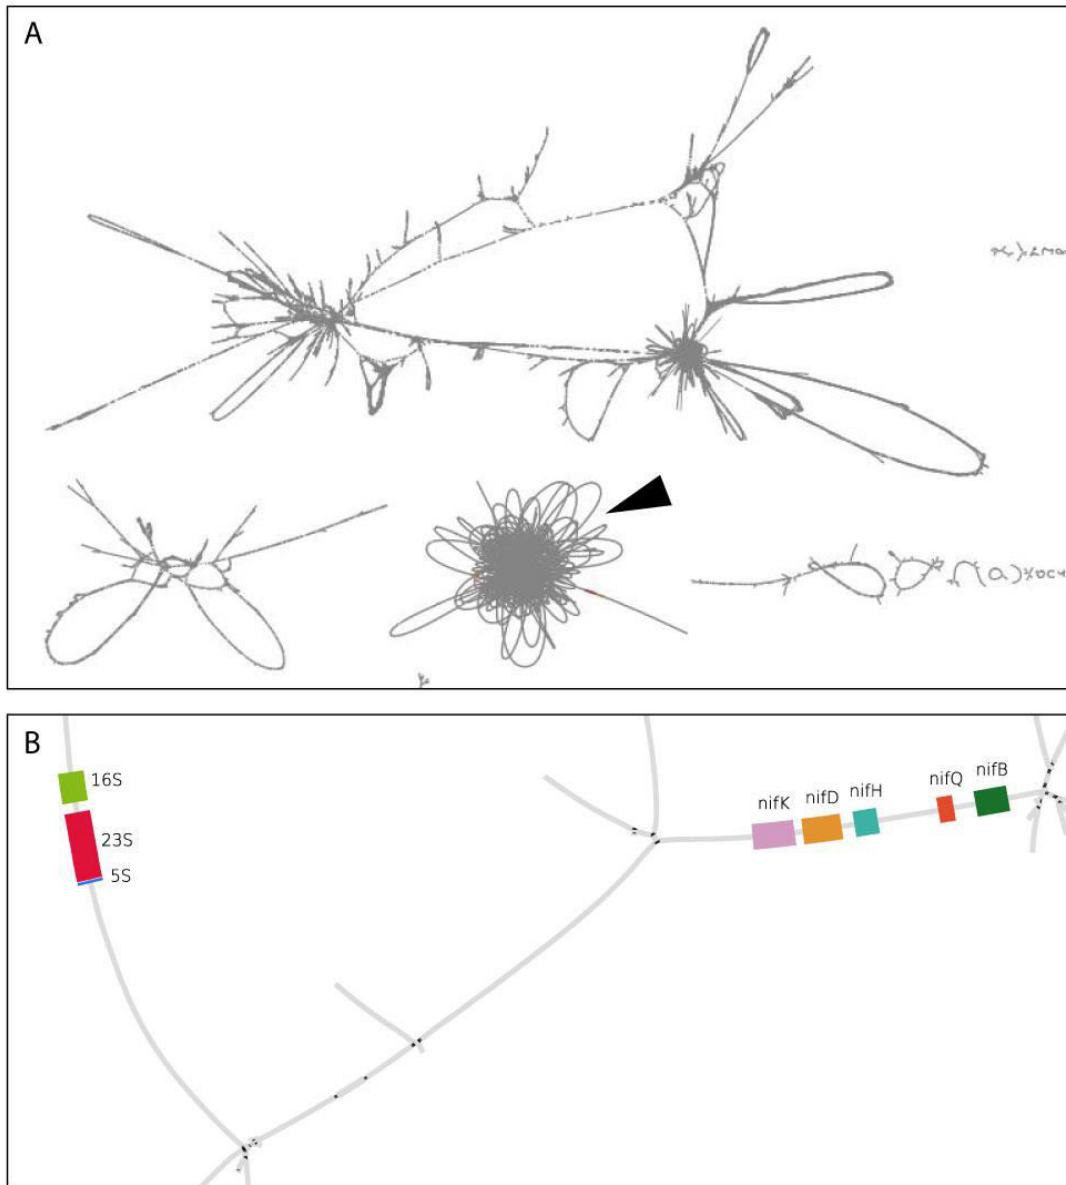

**Supplementary Figure 1. Connectivity analysis of the *Laxus oneistus* A metagenome.** A) Overview of the full assembly graph of the metagenomic assembly. The bin of connected *Ca. Thiosymbion oneisti* contigs is indicated with an arrowhead. B) Detailed view of the graph structure of the *Ca. Thiosymbion oneisti* bin that features the rRNA operon and the core nif operon within eight graph nodes from each other.

## Supplementary Figure 2. Nif gene cluster in *Ca. Thiodiazotropha endoloripes* and comparison with *Azoarcus* sp. BH72

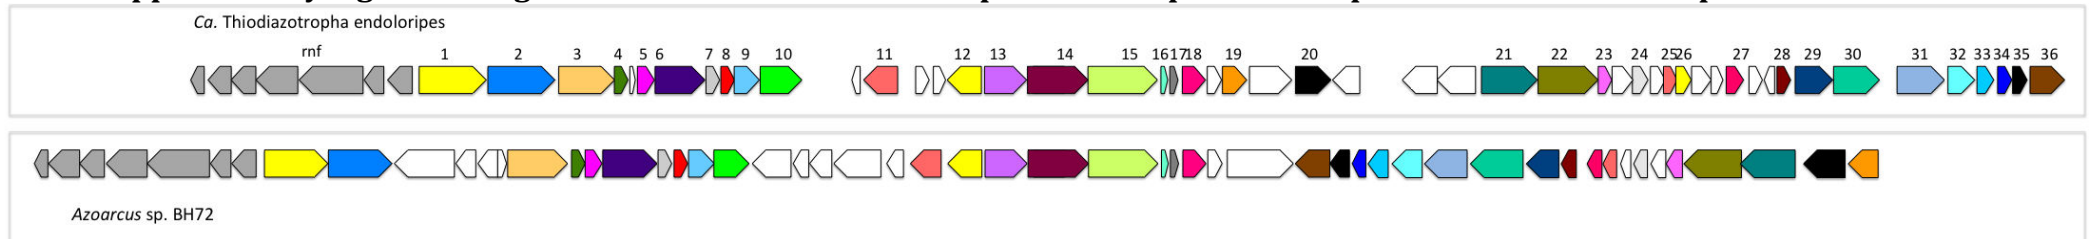

## Supplementary Figure 2. Nif gene cluster in *Ca. Thiodiazotropha endoloripes* and comparison with *Azoarcus* sp. BH72

Schematic representation of the *nif* and *rnf* gene clusters in the *Ca. Thiodiazotropha endoloripes* D draft genome (NCBI Accession: LVJZ00000000), and in the model nitrogen-fixing bacterium *Azoarcus* sp. BH72 (NCBI Accession: NZ\_LARU00000000). Homologs are shown in the same colour in each organism. Gene content and order are identical in all *Ca. Thiodiazotropha endoloripes* draft genomes (not shown). Genes encoding hypothetical proteins are shown in white. Genes with annotations are numbered as follows (RAST annotation):

1. Nitrogen fixation regulatory protein
2. Transcriptional regulator, NifA
3. FeMo-cofactor synthesis, NifB
4. 4Fe-4S ferredoxin, nitrogenase-associated
5. NifO
6. Probable flavoprotein
7. Ferredoxin
8. Ferredoxin
9. NifQ
10. ADP-ribosyl-(dinitrogen reductase) hydrolase
11. Conserved hypothetical protein

12. NAD(+)-dinitrogen reductase ADP-D-ribosyltransferase
13. Nitrogenase reductase asnd maturation protein NifH
14. Nitrogenase alpha chain, NifD
15. Nitrogenase beta chain NifK
16. NifT protein
17. 4Fe-4S ferredoxin, nitrogenase-associated
18. Dinitrogenase iron-molybdenum cofactor biosynthesis
19. LRV (FeS)<sub>4</sub> cluster domain protein clustered with nitrogenase cofactor synthesis, leucine-rich repeat domain
20. Conserved hypothetical protein
21. Nitrogenase assembly protein NifE
22. Nitrogenase assembly protein NifN
23. Nitrogenase FeMo-cofactor carrier NifX
24. NifX-associated protein
25. Ferredoxin III, nif-specific
26. 2Fe-2S ferredoxin
27. Conserved hypothetical protein
28. Iron-binding protein in Nif operon
29. Nitrogenase Fe-S assembly scaffold protein NifU
30. Cysteine desulfurase NifS
31. Homocitrate synthase
32. Serine acetyltransferase
33. Conserved hypothetical protein
34. Nitrogenase stabilizing/protecting NifW
35. NifZ
36. NifM





**Supplementary Figure 3. Phylogeny of NifD proteins.** Maximum likelihood phylogeny of full-length Group 1 NifH proteins. Percentages refer to bootstrap values. Sequences from this study are shown in bold red text.

**Supplementary Figure 4. Top 30 most abundantly expressed genes in *Loripes lucinalis* (Elba) symbionts.**

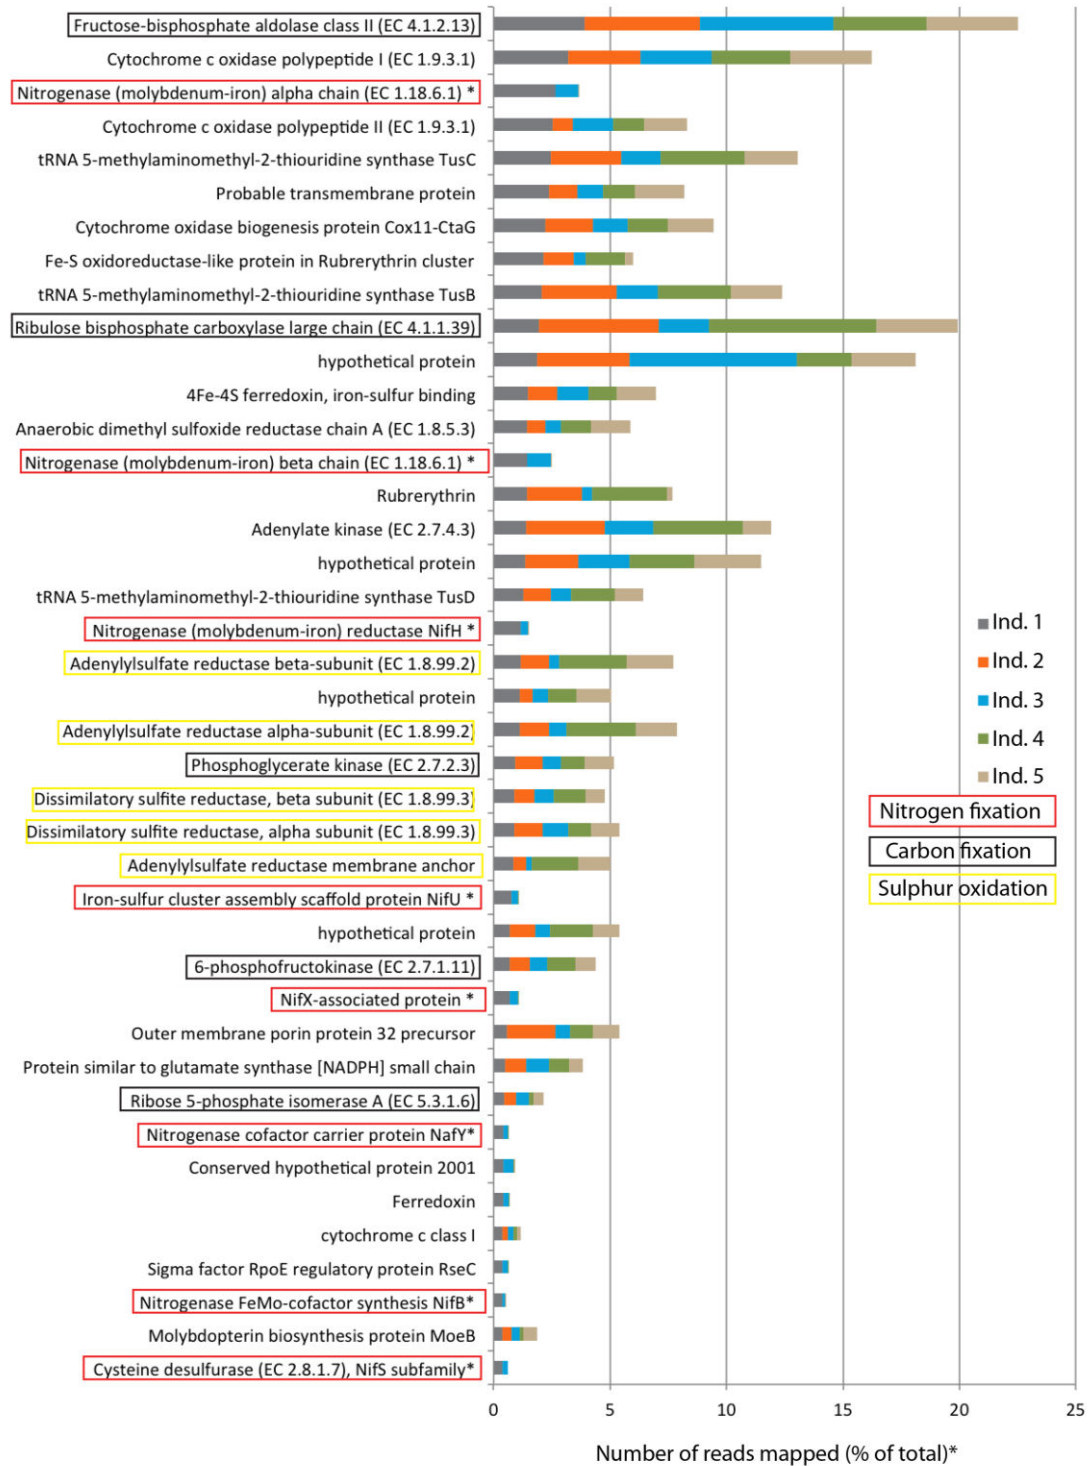

**Supplementary Figure 4. Transcriptome identity plots.** This figure shows the percentage of transcriptome reads (five transcriptomes from individuals 1 – 5)

that mapped to each of the five symbiont draft genomes (*Ca. Thiodiazotropha endoloripes* A – E), according to their nucleotide identity.

## Supplementary Figure 5. Transcriptome identity plots

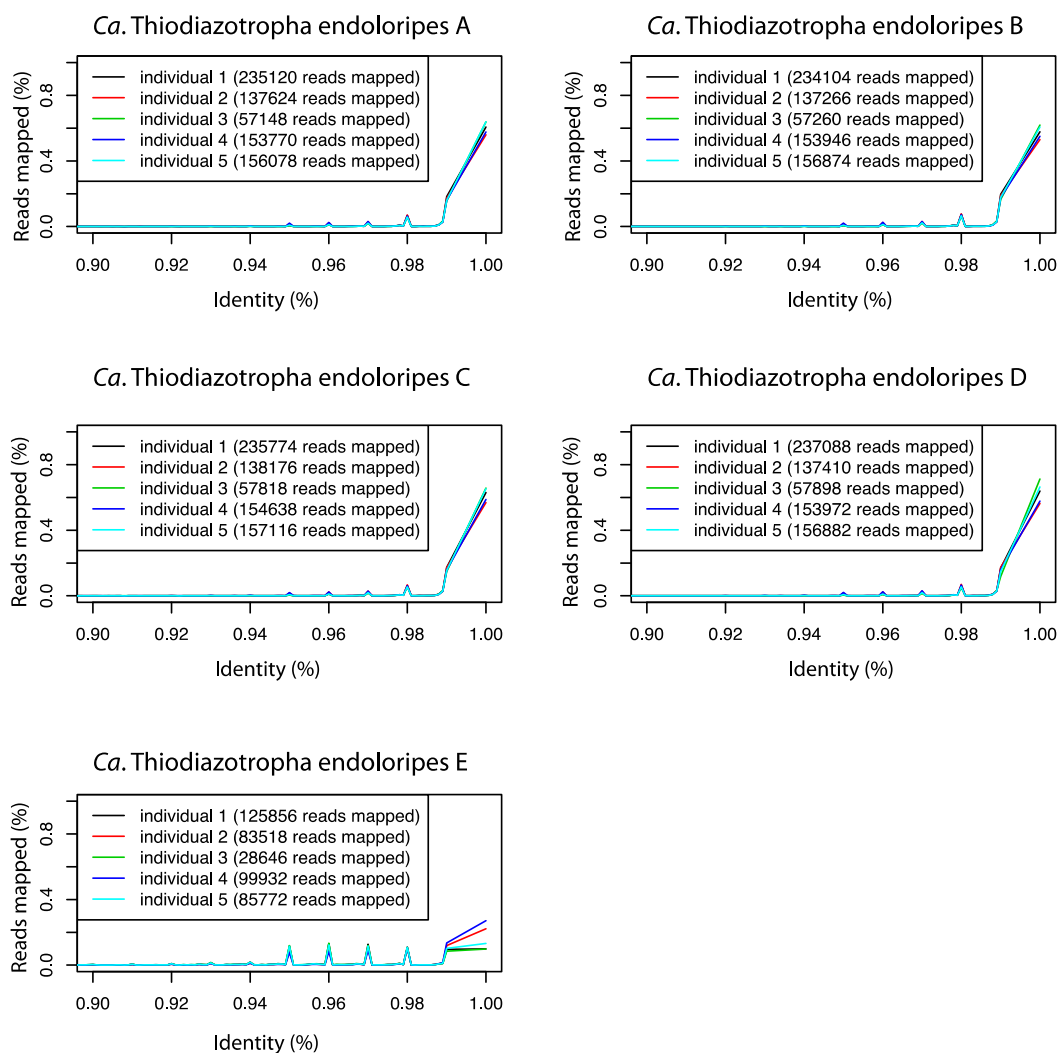

## Supplementary Figure 5. Top 30 most abundantly expressed genes in

***Loripes lucinalis* (Elba) symbionts.** Bar chart of the 30 most abundantly expressed genes (\*Number of reads mapped as a percentage of the total reads mapping to symbiont genes in one individual) in the symbiont transcriptome of *Loripes lucinalis* Individual 1 (grey bars), also showing the abundance of these 30 genes in the transcriptomes of individuals 2 to 5 (orange, blue, green and brown bars). Genes involved in nitrogen fixation are highlighted with an asterisk and indicated by a red box. Genes involved in carbon fixation are shown with a black box, those involved in sulphur oxidation with a yellow box.

**Supplementary Figure 6. Coverage plot of the contig containing the nitrogenase gene cluster in *Ca. Thiodiazotropha endoloripes* A.**

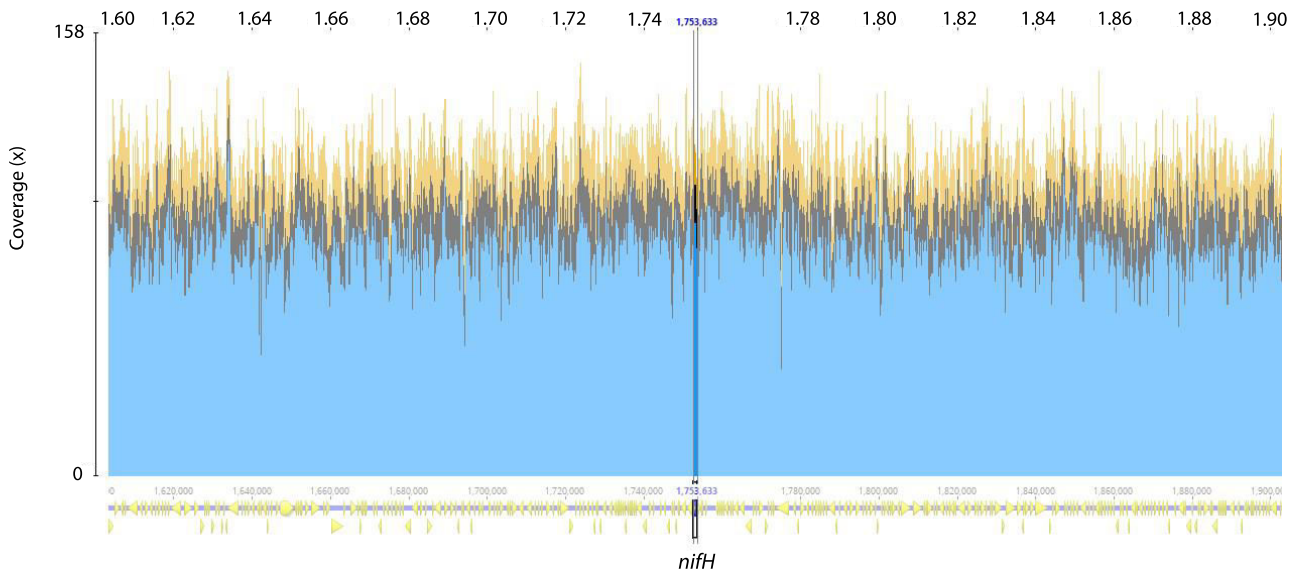

**Supplementary Figure 6. Coverage plot of the contig containing the nitrogenase gene cluster in *Ca. Thiodiazotropha endoloripes* A.** This plot shows the mapping of the metagenome reads from *Ca. Thiodiazotropha endoloripes* A to the portion of the contig containing the nif genes (*nifH* is marked with a vertical line). The contig is plotted on the x axis, with the contig position shown above (the entire contig is 2.4 Mb in length). The coverage (from 0 to 158 x) on the y axis. There is no clear drop in the coverage at the nif gene cluster compared to the surrounding regions, indicating that this gene cluster is present in all symbiont strains. Reads were mapped and visualized in Geneious (<http://www.geneious.com/>).

**Supplementary Dataset 1. Transcriptome mapping results – see separate Excel file ‘Petersen\_SupplementaryDataset1.xls’**

This Excel file lists all predicted symbiont genes, and the number of transcripts that mapped to each gene in the five *Loripes lucinalis* individuals sequenced for transcriptomics. For easier comparison, RAST gene predictions are listed next to NCBI gene predictions.

**Supplementary Dataset 2. Symbiont proteins identified in metaproteomes – see separate Excel file ‘Petersen\_SupplementaryDataset2.xls’**

This Excel file shows all symbiont proteins identified in the six individuals of *Loripes lucinalis* whose gill proteomes were measured.
